# Supplementary material
Source: PubMed Central journal article supplement (PMC3022426)
Supplement: neo1301_0031SD1.pdf [file neo1301_0031SD1.pdf]

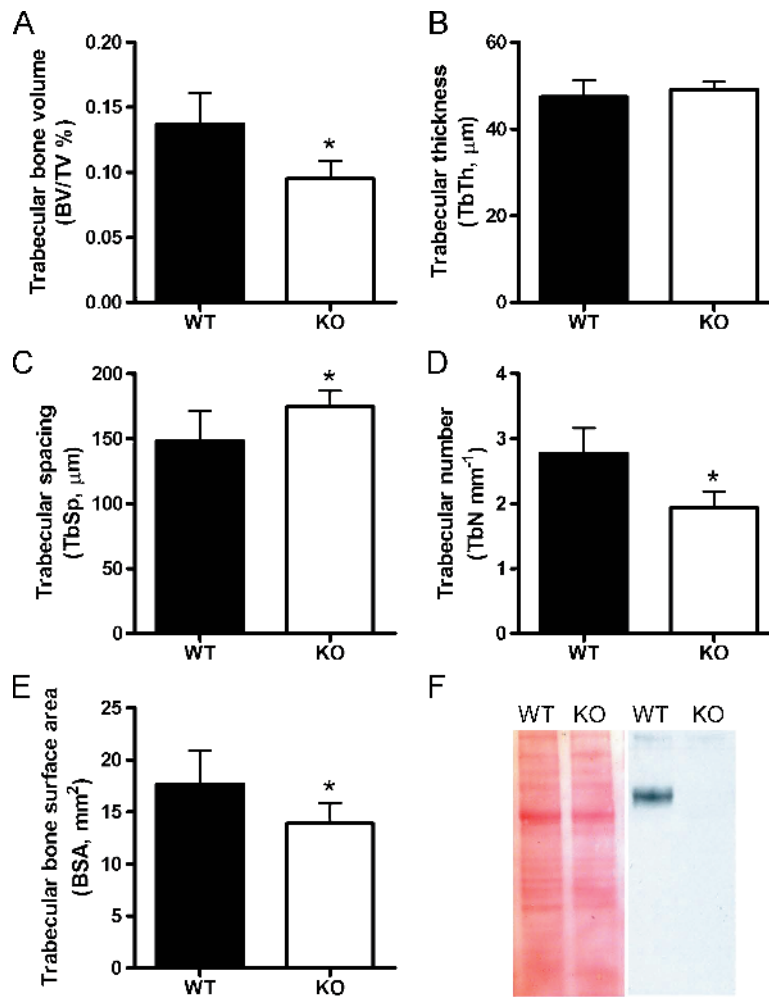

**Figure W1.** SPARC KO tibia display decreased trabecular morphometric parameters. (A–E) MicroCT was used to determine the bone morphometric parameters of SPARC WT (black columns) and KO (white columns) mice: (A) BV/TV, (B) Tb.Th, (C) Tb.Sp, (D) Tb.N, and (E) BSA. Values were represented as mean  $\pm$  SD measured for nine mice. \* $P < .05$  by Student's  $t$  test. (F) Whole bone extracts from femurs of SPARC WT and KO mice lysed with RIPA buffer and separated by SDS-PAGE (4%-12%). (Left) Ponceau S (Sigma)-stained nitrocellulose and (right) immunoblot analysis for SPARC (R&D Systems).

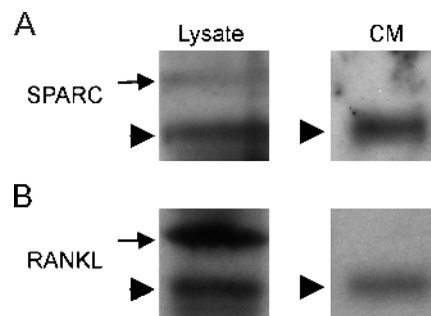

**Figure W2.** RM1 cells express and secrete SPARC and RANKL. RM1 culture lysates and conditioned medium (CM) were collected. Proteins were separated by SDS-PAGE (10%) followed by (A) SPARC and (B) RANKL (Santa Cruz Biotechnology) immunoblot analysis. Both total (SPARC) or transmembrane (RANKL) (arrow) and soluble (arrowhead) forms of the proteins were found.

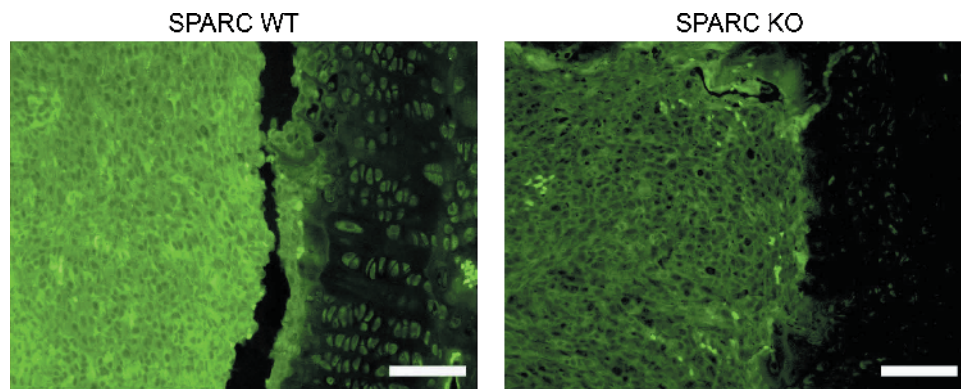

**Figure W3.** RM1 cells produce SPARC *in vivo*. RM1 cells ( $1 \times 10^3$ ) were injected into the tibia of SPARC WT or KO. Bones were isolated after 2 weeks of intraosseous tumor growth and paraffin-embedded bone sections were stained for SPARC (green) using a method modified from Trombetta and Bradshaw (*J Histochem Cytochem* 2010;58:871–879). In brief, sections were deparaffinized, rehydrated, and blocked in 2% donkey serum/0.2% Triton X-100/PBS. Slides were incubated for 1 hour with SPARC antibody (R&D Systems) followed by incubation with an antigoat secondary antibody conjugated to Alexa 488 (Molecular Probes). Coverslips were mounted with Vectashield (Vector Laboratories, Burlingame, CA). Images were taken with a Leica DM2500 light microscope. Scale bars, 50  $\mu\text{m}$ . Representative images from nine mice are shown.

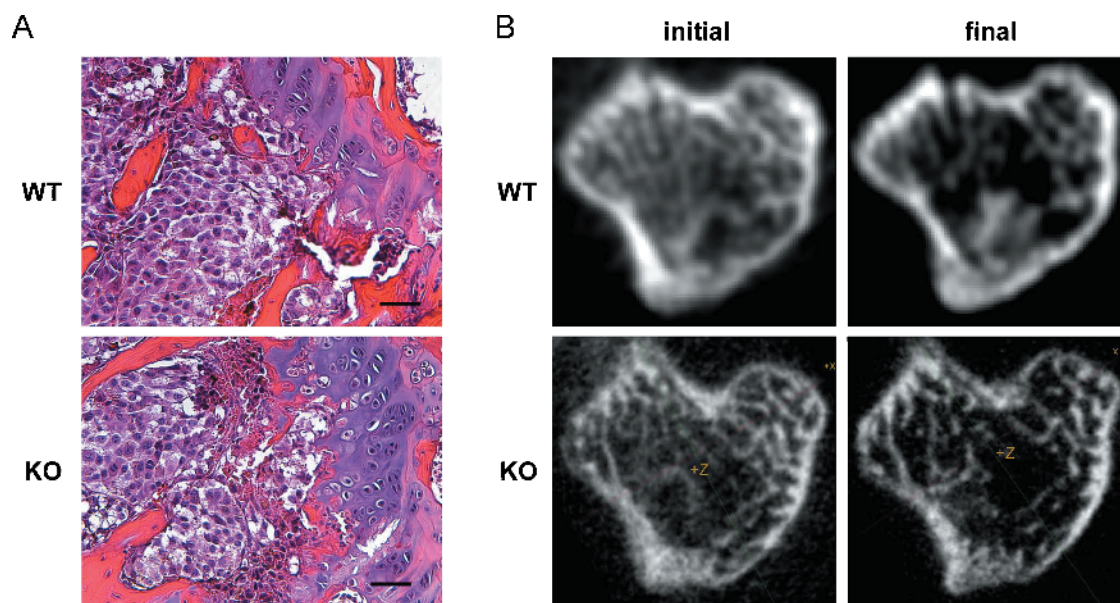

**Figure W4.** Melanoma implantation does not promote osteolysis. B16-F10 murine melanoma cells ( $1 \times 10^4$ ) were injected into the tibiae of SPARC WT and KO mice. (A) Bones were isolated after 2 weeks of intraosseous tumor growth, sectioned, and stained with H&E. B16-F10 cells can be seen growing within proximal metaphysis. Scale bars, 50  $\mu\text{m}$ . (B) MicroCT-derived proximal metaphyseal transaxial slices of the tibiae both 1 day (initial) and 2 weeks (final) after B16-F10 cell implantation. Representative images from nine mice are shown.

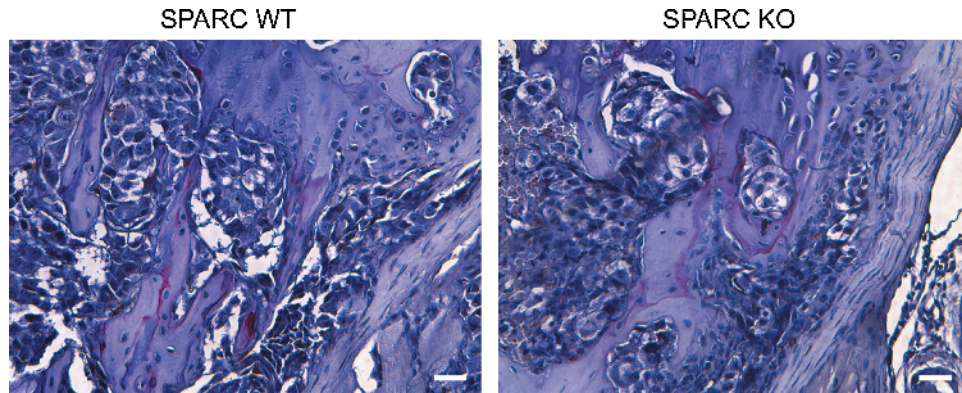

**Figure W5.** Melanoma implantation does not stimulate osteoclast differentiation. B16-F10 cells ( $1 \times 10^4$ ) were injected into the tibia of SPARC WT or KO mice. Bones were isolated after 2 weeks of intraosseous tumor growth and sectioned. Osteoclasts were visualized by TRAP staining (dark red) and counterstained with hematoxylin. Scale bars, 50  $\mu\text{m}$ . Representative images from nine mice are shown.
